# Supplementary material
Source: Springer Nature journal article supplement (https://www.springermedizin.de/resource/supplementary/12939_2011_228_MOESM5_ESM.pdf/9550648)
Supplement: MOESM5 [file 9550648]

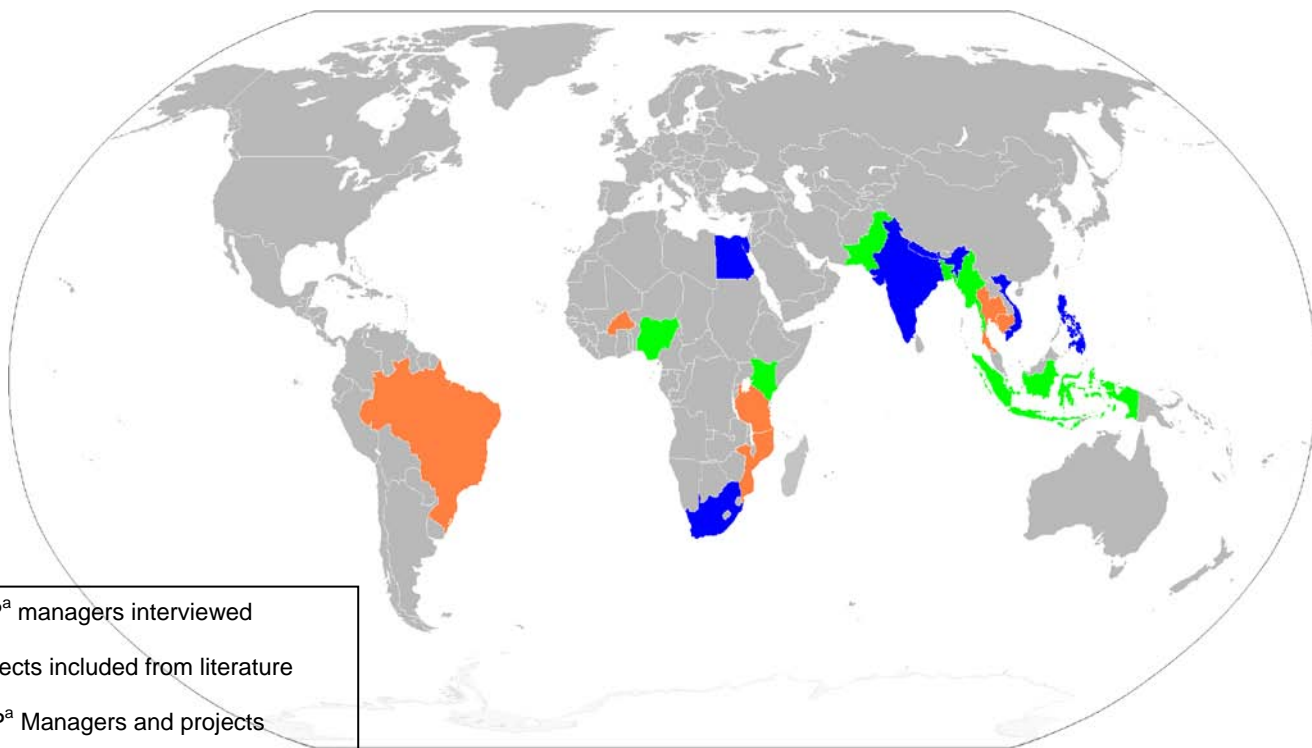

■ NTP<sup>a</sup> managers interviewed  
■ Projects included from literature  
■ NTP<sup>a</sup> Managers and projects

### NTP Managers Interviewed

| Continent | Region                 | Country             |
|-----------|------------------------|---------------------|
| Africa    | E.Africa <sup>b</sup>  | <b>Kenya</b>        |
|           |                        | <b>Mozambique</b>   |
|           |                        | <b>Tanzania</b>     |
|           | W.Africa <sup>c</sup>  | <b>Burkina Faso</b> |
|           |                        | <b>Nigeria</b>      |
|           |                        | <b>Nigeria</b>      |
| Americas  | S.America <sup>d</sup> | <b>Brazil</b>       |
| Asia      | S.Asia <sup>e</sup>    | <b>Bangladesh</b>   |
|           |                        | <b>Pakistan</b>     |
|           | S.E.Asia <sup>f</sup>  | <b>Cambodia</b>     |
|           |                        | <b>Indonesia</b>    |
|           |                        | <b>Myanmar</b>      |
|           |                        | <b>Thailand</b>     |

### Projects included from literature

| Continent | Region          | Proj. ID           | Country             | Site              | Reference             |             |
|-----------|-----------------|--------------------|---------------------|-------------------|-----------------------|-------------|
| Africa    | North Africa    | <b>A.</b>          | <b>Egypt</b>        | National          | 27,28,54              |             |
|           | East Africa     | <b>B.</b>          | <b>Kenya</b>        | Nairobi           | 28,29,30,65           |             |
|           | Southern Africa | <b>C.</b>          | <b>South Africa</b> | Western Cape      | 62                    |             |
| Asia      | West Africa     | <b>D.</b>          | <b>Nigeria</b>      | Kaduna state      | 58                    |             |
|           |                 | South Asia         | <b>E.</b>           | <b>Bangladesh</b> | Damien Foundation     | 30,75       |
|           |                 |                    | <b>F.</b>           | <b>India</b>      | Bangalore             | 32,33       |
|           | Southeast Asia  | <b>G.</b>          |                     | Chennai           | 27,28,68              |             |
|           |                 | <b>H.</b>          |                     | Hyderabad         | 27,28,30,31,34,59,67  |             |
|           |                 | <b>I.</b>          |                     | Kerala            | 30,31,35,44,69        |             |
|           |                 | <b>J.</b>          |                     | Meerut            | 31,76                 |             |
|           |                 | <b>K.</b>          |                     | Mumbai            | 30,31,60,61,77,78     |             |
|           |                 | <b>L.</b>          |                     | New Delhi         | 27-31,34,48,79,80     |             |
|           |                 | <b>M.</b>          |                     | Pune              | 29,30,49,55           |             |
|           |                 | <b>N.</b>          |                     | <b>Nepal</b>      | Lalitpur municipality | 30,52,63,66 |
|           |                 | <b>O.</b>          |                     | <b>Pakistan</b>   | Thatta, district      | 56          |
|           |                 | <b>P.</b>          |                     | <b>Indonesia</b>  | Central Java          | 14,15       |
|           |                 | <b>Q.</b>          |                     |                   | Timika                | 53          |
|           |                 | <b>R.</b>          |                     |                   | Yogyakarta            | 14,15,30,81 |
| <b>S.</b> |                 | <b>Myanmar</b>     | Mandalay Division   | 50                |                       |             |
| <b>T.</b> |                 |                    | SQH Franchise       | 30,51             |                       |             |
| <b>U.</b> |                 | <b>Philippines</b> | Manila              | 27,28,30,64,82,83 |                       |             |
| <b>V.</b> |                 | <b>Vietnam</b>     | Ho Chi Minh City    | 29,57,70,71       |                       |             |

a NTP = National Tuberculosis Program  
 b E. Africa = East Africa  
 c W. Africa = West Africa  
 d S. America = South America  
 e S. Asia = South Asia  
 f S.E. Asia = South East Asia
